# Supplementary material
Source: Research Square preprint supplement (doi:10.21203/rs.3.rs-9687112/v1)
Supplement: Supplementary file 2 [file ef1e6e8befef9b0a2dba8bf6.docx]

**Online Supplemental**

**Disproportionate carbon footprint of isoflurane in super-refractory status epilepticus**

1Gaspard de Saint Anthost (M.D.), 1Ambre Preteux, 2Davuth Tan, 1Adam Celier (M.D.), 1Loïc Le Guennec (M.D., Ph.D.), 1Clémence Marois (M.D.)

**Methodology for Carbon Footprint calculation**

We performed a comparative life cycle analysis of the ecological impact of IV sedatives and one volatile anesthetic agent used for seizure control in SRSE. The carbon emissions, expressed in kilograms of carbon dioxide equivalents (kgCO2eq), were estimated for propofol 1% and 2%, midazolam, thiopental, esketamine, ketamine and isoflurane using a comparative process-based Life Cycle Analysis (LCA) methodology following the ISO 14040/44 standards. The functional unit was defined as the administration of an anesthetic agent (sedative or volatile anesthetic) to an average patient admitted to a neurological ICU over a 24-hour treatment period. The reference flow includes the anesthetic agents as well as all medical devices and materials required for a standard preparation protocol. The system boundaries include the administration of the anesthetics and exclude all fixed assets in the ICU as well as the impacts related to the operation of the unit (heating, lighting, etc.) We employed the “Carbone” tool developed by Assistance Publique des Hôpitaux de Paris (AP-HP)) in 2023. For each therapeutic agent, carbon footprint calculation, for each therapeutic agent, encompassed, active pharmaceutical ingredient production, excipients and formulation, packaging materials (vials, ampoules), medical devices for preparation (syringes, infusion sets, preparation needles, Y-connectors), dilution solutions (sodium chloride 0,9%, 50 mL bags), transport and conditioning, waste disposal and end-of-life management. For each IV anesthetic, the carbon footprint of one complete syringe preparation was calculated, including all medical devices and materials required according to standard preparation protocols. This unit carbon footprint (kgCO2e per syringe) was then multiplied by the number of syringes required per hour, which varies according to the prescribed dose (mg/kg/h) and patient weight (kg). The calculation formula was: **Carbon footprint per hour (KgCO2e/h) = [(Number of syringes/h × Carbon footprint per syringe) + (Number of infusion sets/h × Carbon footprint per infusion set)].** Where: Number of syringes/h = (Dose in mg/kg/h × Patient weight in kg) / Drug content per syringe (mg). Infusion sets were calculated based on weekly replacement protocols divided by treatment duration. Reference dosing ranges from published guidelines were used to model carbon footprint variations: propofol (3-4 mg/kg/h); midazolam (0,2-0,5 mg/kg/h); thiopental (2-5 mg/kg/h); ketamine (0,5-5 mg/kg/h); esketamine (0,25-2,5 mg/kg/h). For isoflurane, the carbon footprint included the AnaConDa® (Sedana Medical) reflector device, specific infusion sets, and the liquid anesthetic agent. Emissions were calculated for dosing ranges of 2-14 mL/h to achieve target end-tidal concentrations between 0,5% and 1.5%. Carbon footprints were calculated for 24-hour treatment periods at minimum, average, and maximum recommended doses for a reference patient weighing 70 kg. Results are presented as both hourly emissions (kgCO2eq per hour) and total 24-hour emissions (kgCO2eq per day), with their confidence uncertainty intervals. The uncertainties were calculated for each carbon footprint, and the total uncertainty for each scenario was estimated using the uncertainty propagation formula.

**Carbon Footprint and Costs Results**

*Legend: MD for medical device; GHG for Greenhouse Gas. Results are expressed in kgCO2eq for carbon emissions with their incertitude confidence intervals. Costs are expressed in euros (€).*

| TREATMENT | DOSES | Dose min h | | Dose mean h | Dose max h | Dose  min 24h | Dose mean 24h | Dose  max 24h | Incertitude | %  Medicine | %MD administration | % GHG - atmospheric release | Medicine | DM for administration | Atmospheric Gas Emission | Costs over 24h, for mean doses |
| --- | --- | --- | --- | --- | --- | --- | --- | --- | --- | --- | --- | --- | --- | --- | --- | --- |
| THIOPENTAL PAMPHARMA 500 MG (powder) | 2-5 mg/kg/h | | 0,39 [0,21 – 0,57] | **0,68** [0,50 – 0,86] | 0,97 [0,79 – 1,15] | 9,28 [4,96 – 13,60] | **16,23** [11,91 – 20,55] | 23,19 [18,87 – 27,51 | 55% | 75% | 25% | 0% | 0,50 | 0,17 | 0,00 | 132,64 € |
| ISOFLURANE 100% (1 ml/ml) liquid for inhalation vapor | 2-14  ml/h | | 1,77 [0,26 – 3,28] | **6,68** [5,17 – 8,19] | 11,59 [10,08 – 13,10] | 57,03 [20,79 – 93,27] | **218,61** [182,37 – 254,85] | 380,19 [343,95 – 416,43] | 45% | 24% | 6% | 71% | 1,58 | 0,38 | 4,72 | 2 269,77 € |
| ESKETAMINE IDD 250 mg/10ml (25 mg/ml) | 0,25-2,5 mg/kg/h | | 0,04 [0,00 – 0,10] | **0,21** [0,15 – 0,27] | 0,38 [0,32 – 0,44] | 0,92 [0,00 – 2,36] | **5,03** [3,59 – 6,47] | 9,14 [7,70 – 10,58] | 59% | 74% | 26% | 0% | 0,16 | 0,05 | 0,00 | 59,09 € |
| KETAMINE 250mg/5ml (50 mg/ml) | 0,5-5 mg/kg/h | | 0,05 [0,00 – 0,12] | **0,25** [0,18 – 0,32] | 0,45 [0,38 – 0,52] | 1,08 [0,00 – 2,76] | **5,91** [4,23 – 7,59] | 10,74 [9,06 – 12,42] | 63% | 78% | 22% | 0% | 0,19 | 0,06 | 0,00 | 118,13 € |
| MIDAZOLAM VIATRIS (50 mg/10 ml) | 0,2-0,5 mg/kg/h | | 0,03 [0,026 – 0,034] | **0,05** [0,046 – 0,054] | 0,07 [0,066 – 0,074] | 0,68 [0,58 – 0,78] | **1,17** [1,07 – 1,27] | 1,67 [1,57 – 1,77] | 17% | 53% | 47% | 0% | 0,03 | 0,02 | 0,00 | 15,07 € |
| PROPOFOL LIPURO 10 mg/ml 1% | 3-4 mg/kg/h | | 0,28 [0,25 – 0,31] | **0,32** [0,29 – 0,35] | 0,37 [0,34 – 0,40] | 6,66 [5,94 – 7,38] | **7,77** [7,05 – 8,49] | 8,88 [8,16 – 9,60] | 21% | 65% | 35% | 0% | 0,21 | 0,11 | 0,00 | 24,97 € |
| PROPOFOL KABI 20mg/ml injectable emulsion in pre-filled syringe | 3-4 mg/kg/h | | 0,09 [0,07 – 0,11] | **0,11** [0,09 – 0,13] | 0,13 [0,11 – 0,15] | 2,28 [1,80 – 2,76] | **2,66** [2,18 – 3,14] | 3,03 [2,55 – 3,51] | 53% | 99% | 1% | 0% | 0,11 | 0,00 | 0,00 | 70,60 € |
